# Supplementary material for: Anchoring and catalytic insights into bilayer C4N3 material for lithium–selenium batteries: a first-principles study
Source: Royal Society of Chemistry journal article supplement (doi:10.1039/d3cp05075k), 2024-01-01

## Supporting Information

For

### **Anchoring and catalytic insights into bilayer C<sub>4</sub>N<sub>3</sub> material for lithium-selenium batteries: a first-principles study**

Zehui Yang,<sup>a</sup> Wentao Liu,<sup>a</sup> Shulin Bai,<sup>a</sup> Peng Ai,<sup>a</sup> Hao Wang,<sup>a</sup> Tuo Zheng<sup>a</sup>, Qingshun Li<sup>a</sup> and  
Shuwei Tang<sup>\*a</sup>

<sup>a</sup> College of Materials Science and Engineering, Liaoning Technical University, Fuxin, Liaoning  
123000, China.

Corresponding authors:

Shuwei Tang

E-mail: [tangsw911@nenu.edu.cn](mailto:tangsw911@nenu.edu.cn)

College of Materials Science & Engineering

Liaoning Technical University

Zhonghua Road. #47

Fuxin, Liaoning

123000, China

Tel/Fax: +86-418-5110098

## Contents

1. **Table S1.** The adsorbed structures and binding energies for  $\text{Se}_8$  and  $\text{Li}_2\text{Se}_n$  ( $n = 1, 2, 4, 6, 8$ ) molecules at different lithiation stages within the AA-stacking bilayer  $\text{C}_4\text{N}_3$ .....Page S3
2. **Table S2.** The adsorbed structures and binding energies for  $\text{Se}_8$  and  $\text{Li}_2\text{Se}_n$  ( $n = 1, 2, 4, 6, 8$ ) molecules at different lithiation stages within the AB-stacking bilayer  $\text{C}_4\text{N}_3$ .....Page S4
3. **Table S3.** The optimized configurations for  $\text{Se}_8$  and  $\text{Li}_2\text{Se}_n$  ( $n = 1, 2, 4, 6, \text{ and } 8$ ) interacting with the different electrolytes .....Page S5

**Table S1.** The adsorbed structures and binding energies for  $\text{Se}_8$  and  $\text{Li}_2\text{Se}_n$  ( $n = 1, 2, 4, 6, 8$ ) molecules at different lithiation stages within the

| $\text{Li}_2\text{Se}$                                                                                 | $\text{Li}_2\text{Se}_2$                                                                              | $\text{Li}_2\text{Se}_4$                                                                                | $\text{Li}_2\text{Se}_6$                                                                                | $\text{Li}_2\text{Se}_8$                                                                                 | $\text{Se}_8$                                                                                            |
|--------------------------------------------------------------------------------------------------------|-------------------------------------------------------------------------------------------------------|---------------------------------------------------------------------------------------------------------|---------------------------------------------------------------------------------------------------------|----------------------------------------------------------------------------------------------------------|----------------------------------------------------------------------------------------------------------|
| 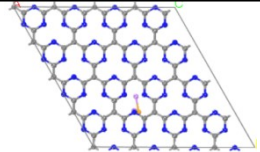<br>$E_b = 4.79$ eV   | <br>$E_b = 4.53$ eV  | <br>$E_b = 2.74$ eV   | <br>$E_b = 2.34$ eV  | <br>$E_b = 2.31$ eV   | <br>$E_b = 1.10$ eV   |
| <br>$E_b = 4.74$ eV   | <br>$E_b = 4.16$ eV  | <br>$E_b = 2.62$ eV   | <br>$E_b = 2.30$ eV  | <br>$E_b = 2.21$ eV   | <br>$E_b = 1.06$ eV   |
| <br>$E_b = 4.64$ eV   | <br>$E_b = 4.01$ eV  | <br>$E_b = 2.59$ eV   | <br>$E_b = 2.04$ eV  | <br>$E_b = 1.94$ eV   | <br>$E_b = 1.00$ eV   |
| <br>$E_b = 4.64$ eV  | <br>$E_b = 3.32$ eV | <br>$E_b = 1.96$ eV  | <br>$E_b = 1.37$ eV | <br>$E_b = 1.85$ eV  | <br>$E_b = 0.69$ eV  |
| <br>$E_b = 4.06$ eV |                                                                                                       | <br>$E_b = 1.14$ eV |                                                                                                         | <br>$E_b = 1.03$ eV | <br>$E_b = 0.08$ eV |

AA-stacking bilayer  $\text{C}_4\text{N}_3$ .

**Table S2.** The adsorbed structures and binding energies for  $\text{Se}_8$  and  $\text{Li}_2\text{Se}_n$  ( $n = 1, 2, 4, 6, 8$ ) molecules at different lithiation stages within the AB-stacking bilayer  $\text{C}_4\text{N}_3$ .

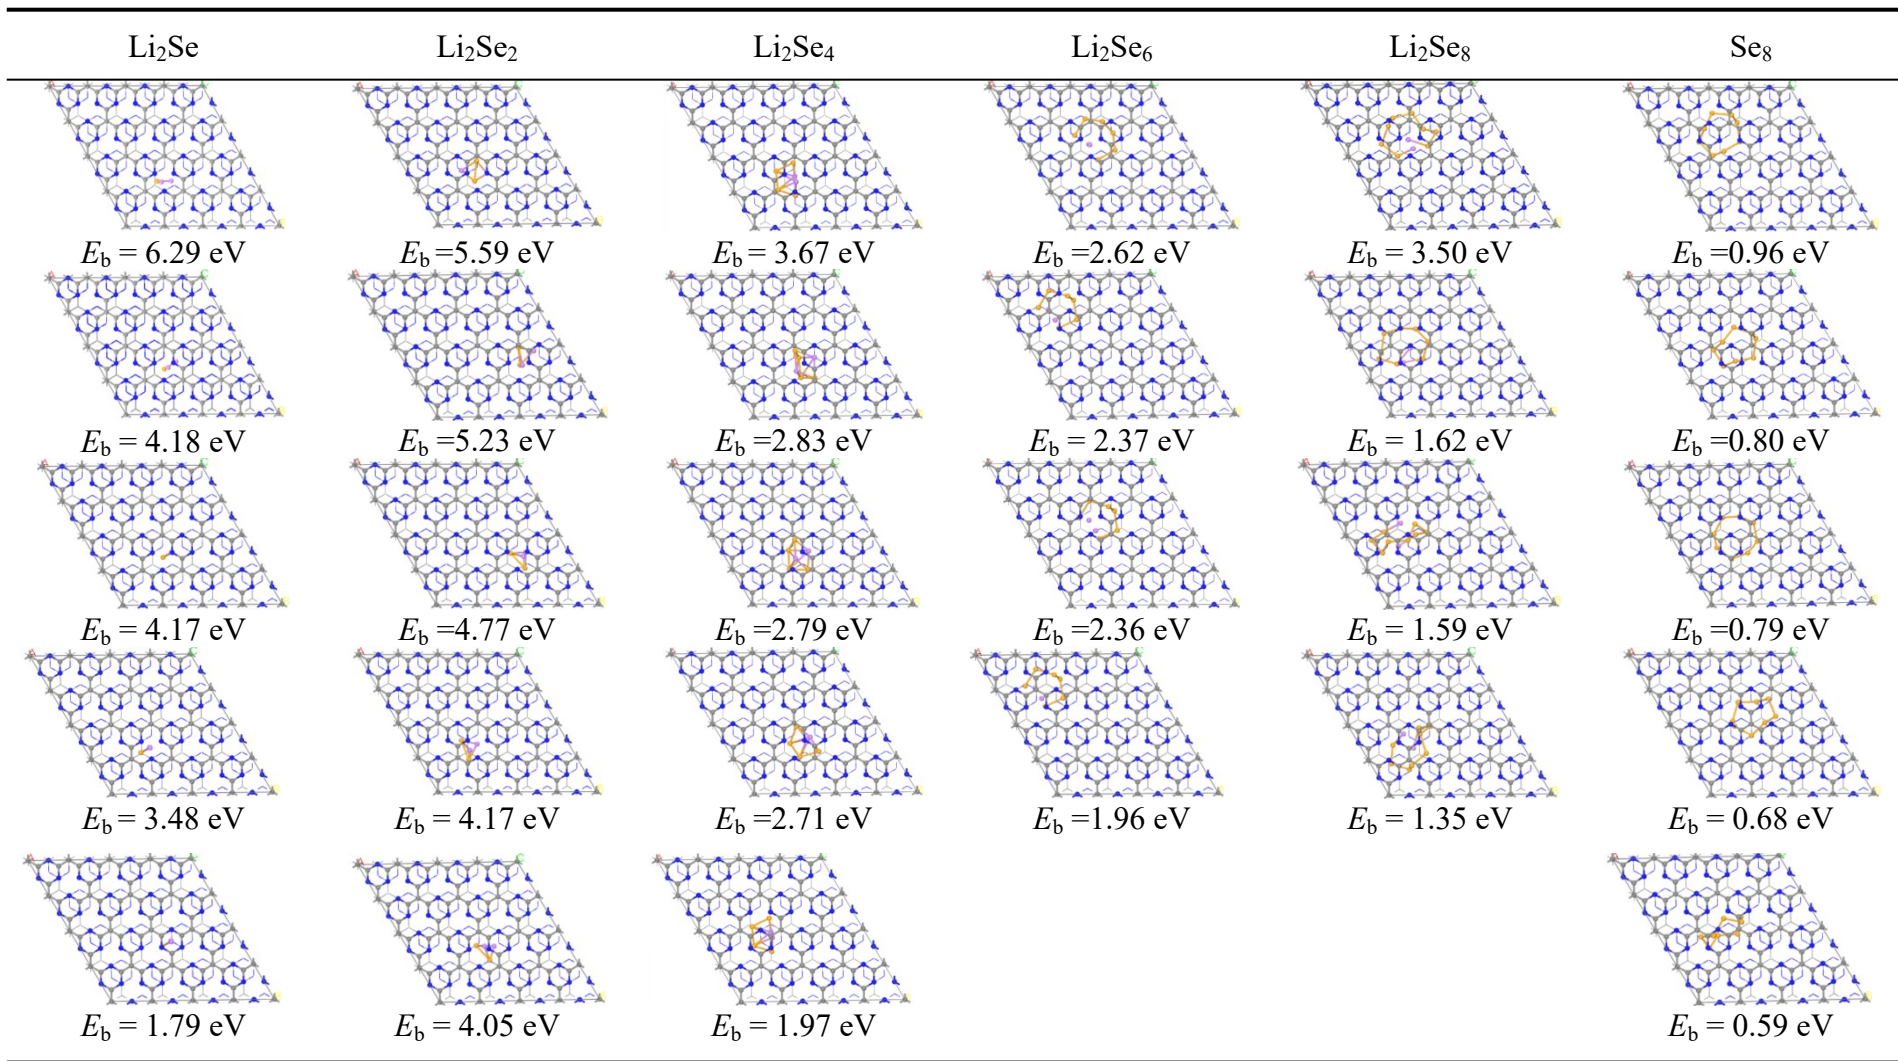



**Table S3.** The optimized configurations for  $\text{Se}_8$  and  $\text{Li}_2\text{Se}_n$  ( $n = 1, 2, 4, 6, \text{ and } 8$ ) interacting with the different electrolytes (EC, DEC, and DOL).

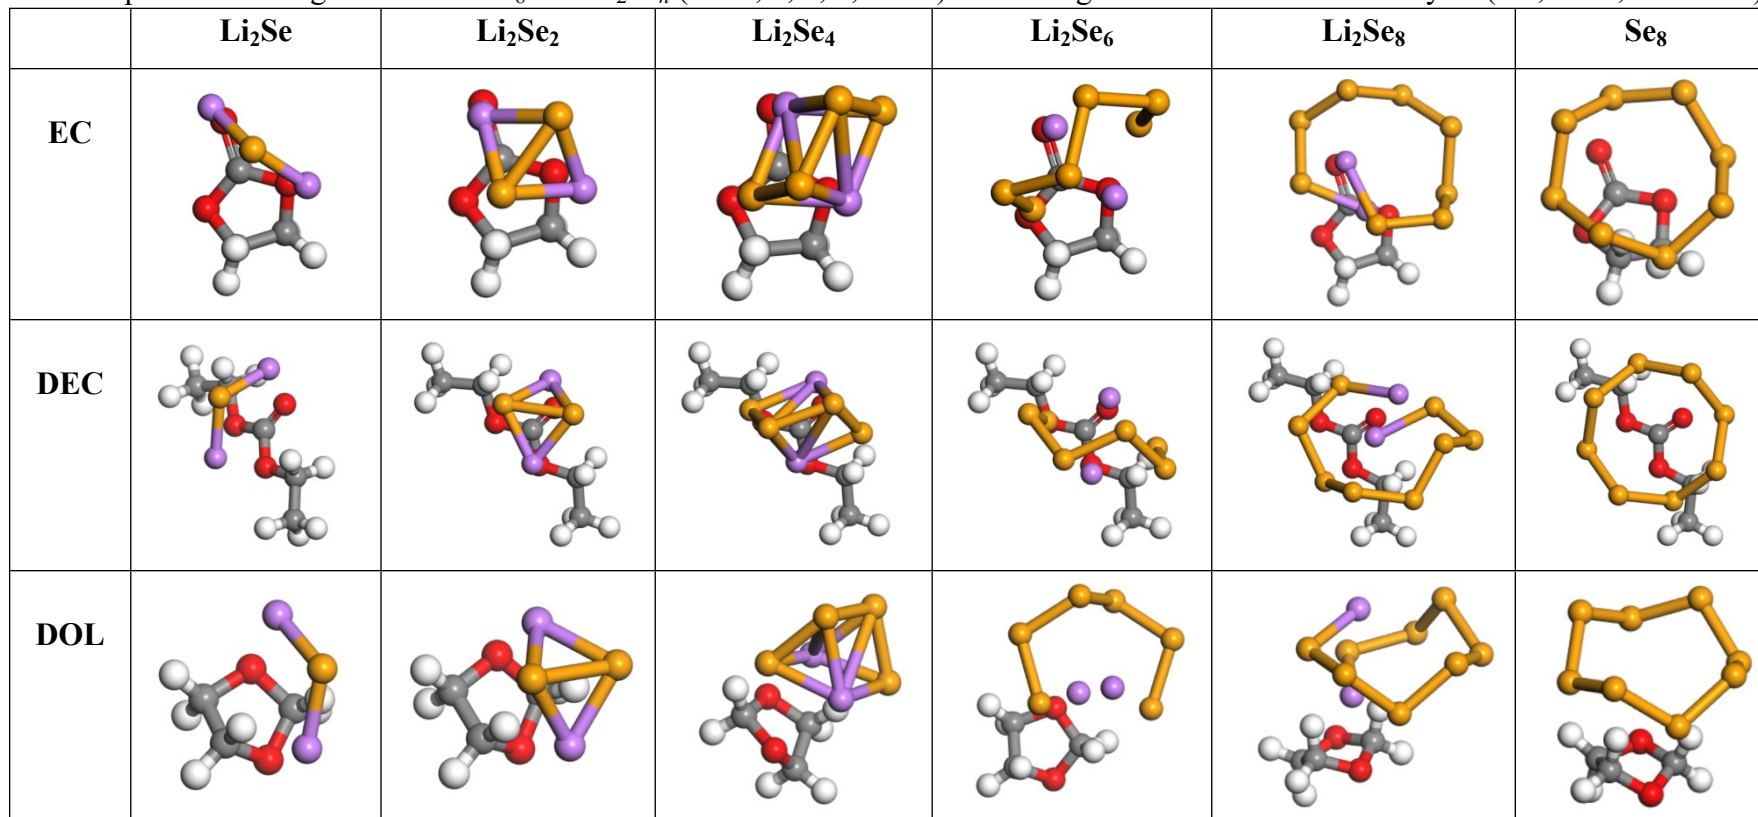

Supplement: d3cp05075k1.pdf [file d3cp05075k1.pdf]
